# Supplementary material for: Switchable immune modulator for tumor-specific activation of anticancer immunity
Source: PubMed Central journal article supplement — Sci Adv. 2021 Sep 10;7(37):eabg7291. doi: 10.1126/sciadv.abg7291 (PMC8442900; doi:10.1126/sciadv.abg7291), 2021-09-10
Supplement: sciadv.abg7291_sm.pdf [file sciadv.abg7291_sm.pdf]

Supplementary Materials for

**Switchable immune modulator for tumor-specific activation  
of anticancer immunity**

Yu Zhao, Yu-Qing Xie, Simon Van Herck, Sina Nassiri, Min Gao,  
Yugang Guo, Li Tang\*

\*Corresponding author. Email: [li.tang@epfl.ch](mailto:li.tang@epfl.ch)

Published 10 September 2021, *Sci. Adv.* 7, eabg7291 (2021)  
DOI: [10.1126/sciadv.abg7291](https://doi.org/10.1126/sciadv.abg7291)

**This PDF file includes:**

Figs. S1 to S16  
Table S1

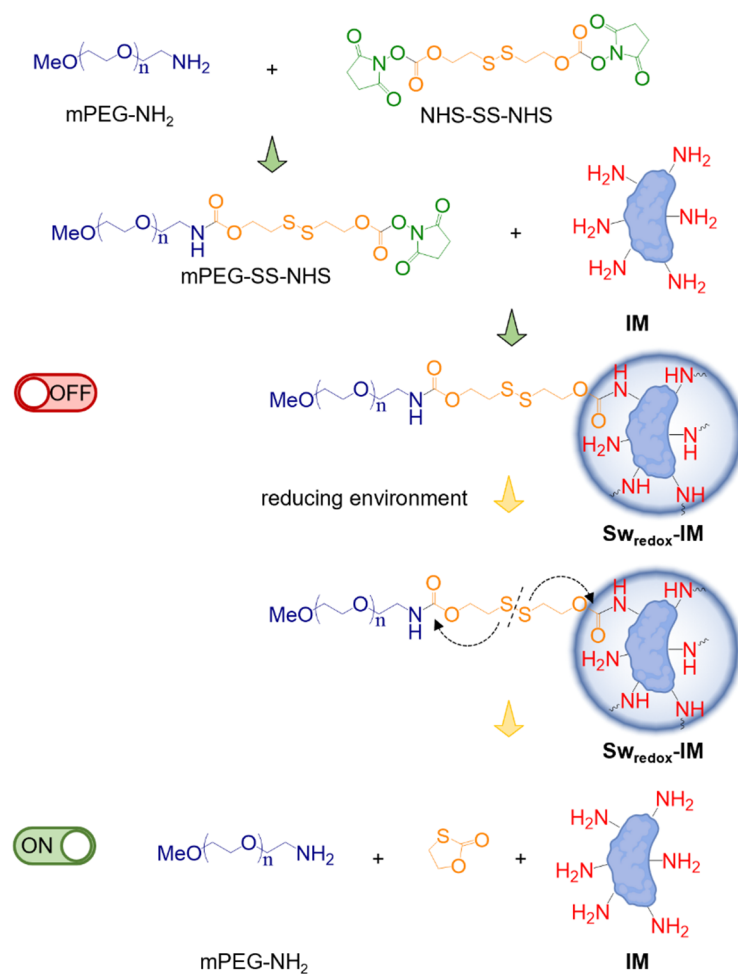

**Fig. S1. Synthesis of redox-responsive switchable immune modulators (Sw<sub>redox</sub>IMs) and selective switch on in the reducing environment.** mPEG-NH<sub>2</sub>, methoxy polyethylene glycol amine; NHS-SS-NHS, a redox-responsive linker bis(2,5-dioxopyrrolidin-1-yl) (disulfanediylbis(ethane-2,1-diyl) dicarbonate).

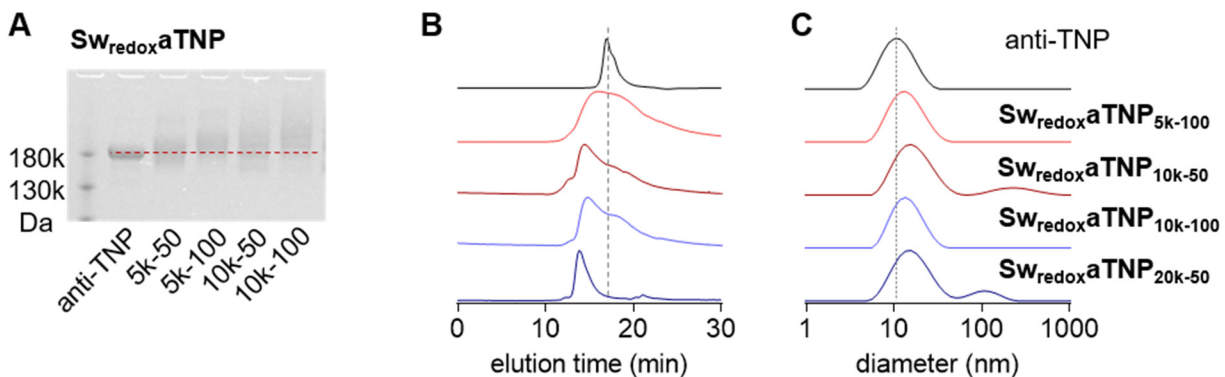

**Fig. S2. Characterizations of  $Sw_{redox}aTNPs$ .** (A) Sodium dodecyl sulfate-polyacrylamide gel electrophoresis (SDS-PAGE) characterizations of  $Sw_{redox}aTNPs$ . (B) Ultra high-performance liquid chromatography (UHPLC) traces of  $Sw_{redox}aTNPs$  with a size exclusion chromatography (SEC) column. (C) Hydrodynamic diameters of  $Sw_{redox}aTNPs$  measured by dynamic light scattering (DLS). Dash lines indicate the molecular weight (A), elution time (B), and hydrodynamic diameter (C) of native anti-trinitrophenal (TNP) antibody.

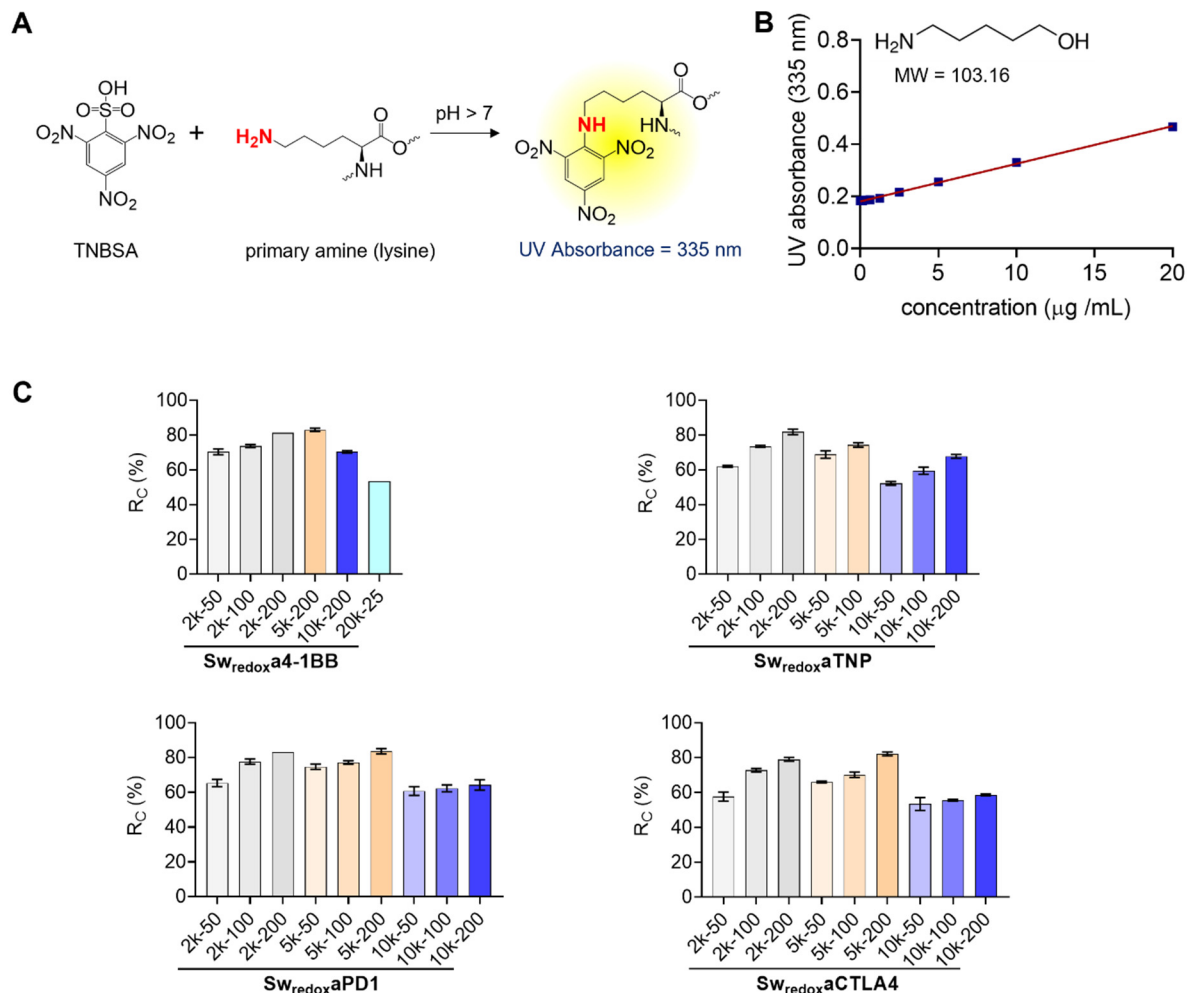

**Fig. S3. Conjugation ratio ( $R_c$ ) of Sw-IMs.** (A) Schematic illustration of 2,4,6-trinitrobenzene sulfonic acid (TNBSA) assay for quantifying the number of primary amino groups. (B) Calibration curve using 5-amino-1-pentanol as a standard in TNBSA assay. (C) Conjugation ratio ( $R_c$ ) of **Sw<sub>redox</sub>a4-1BBs**, **Sw<sub>redox</sub>aTNPs**, **Sw<sub>redox</sub>aPD1s**, and **Sw<sub>redox</sub>aCTLA4s**.  $R_c$  defined as the percentage of PEG conjugated amino groups among all the detectable amino groups in the molecule.

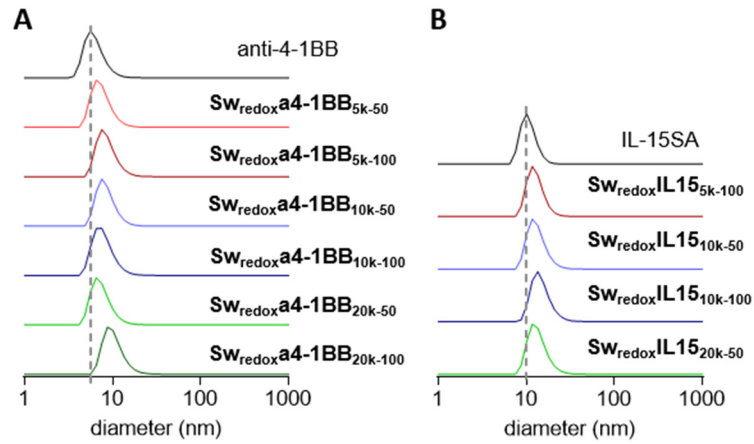

**Fig. S4. DLS characterizations of  $Sw_{redox}$ IMs.** (A) Hydrodynamic diameters of  $Sw_{redox}a4-1BB$ s. (B) Hydrodynamic diameters of  $Sw_{redox}IL15$ s. Dash lines indicate the size of the native antibody or cytokine.

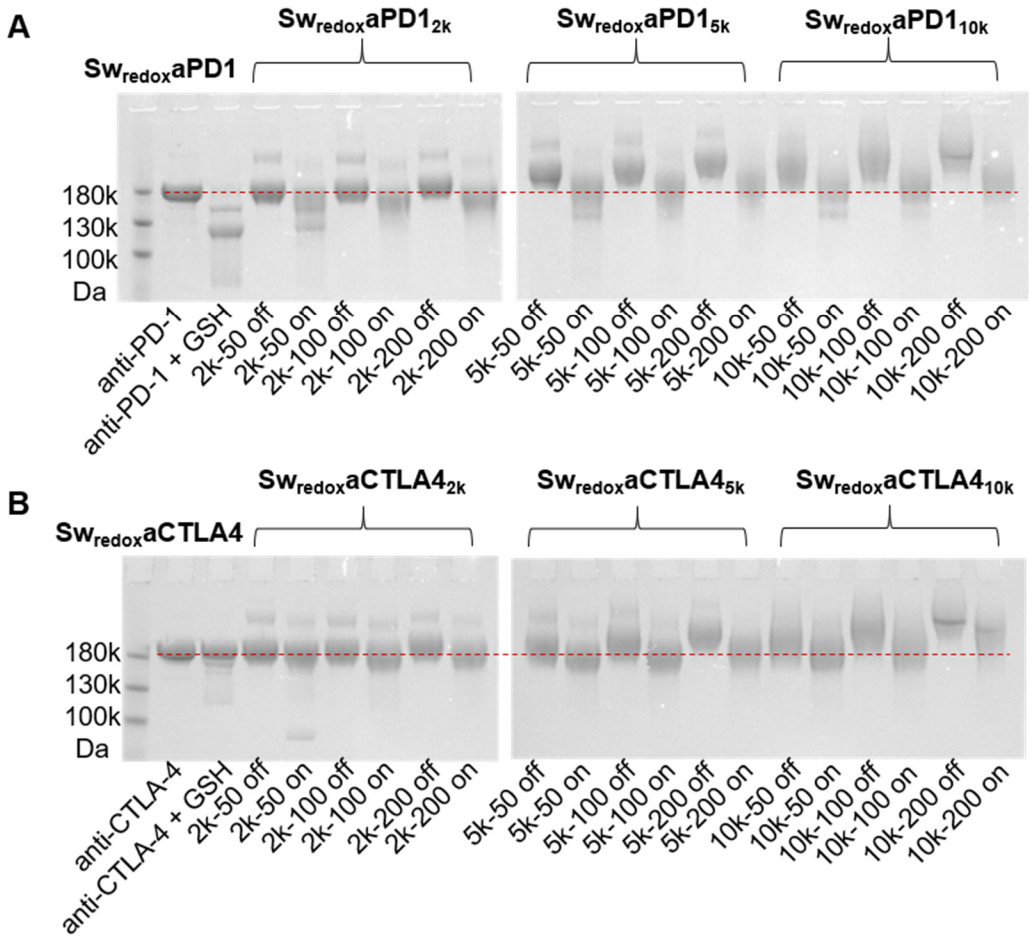

**Fig. S5. SDS-PAGE characterizations of Sw<sub>redox</sub>aPD1s (A) and Sw<sub>redox</sub>aCTLA4s (B) at off and on status.** Dash lines indicate the molecular weight of native antibodies.

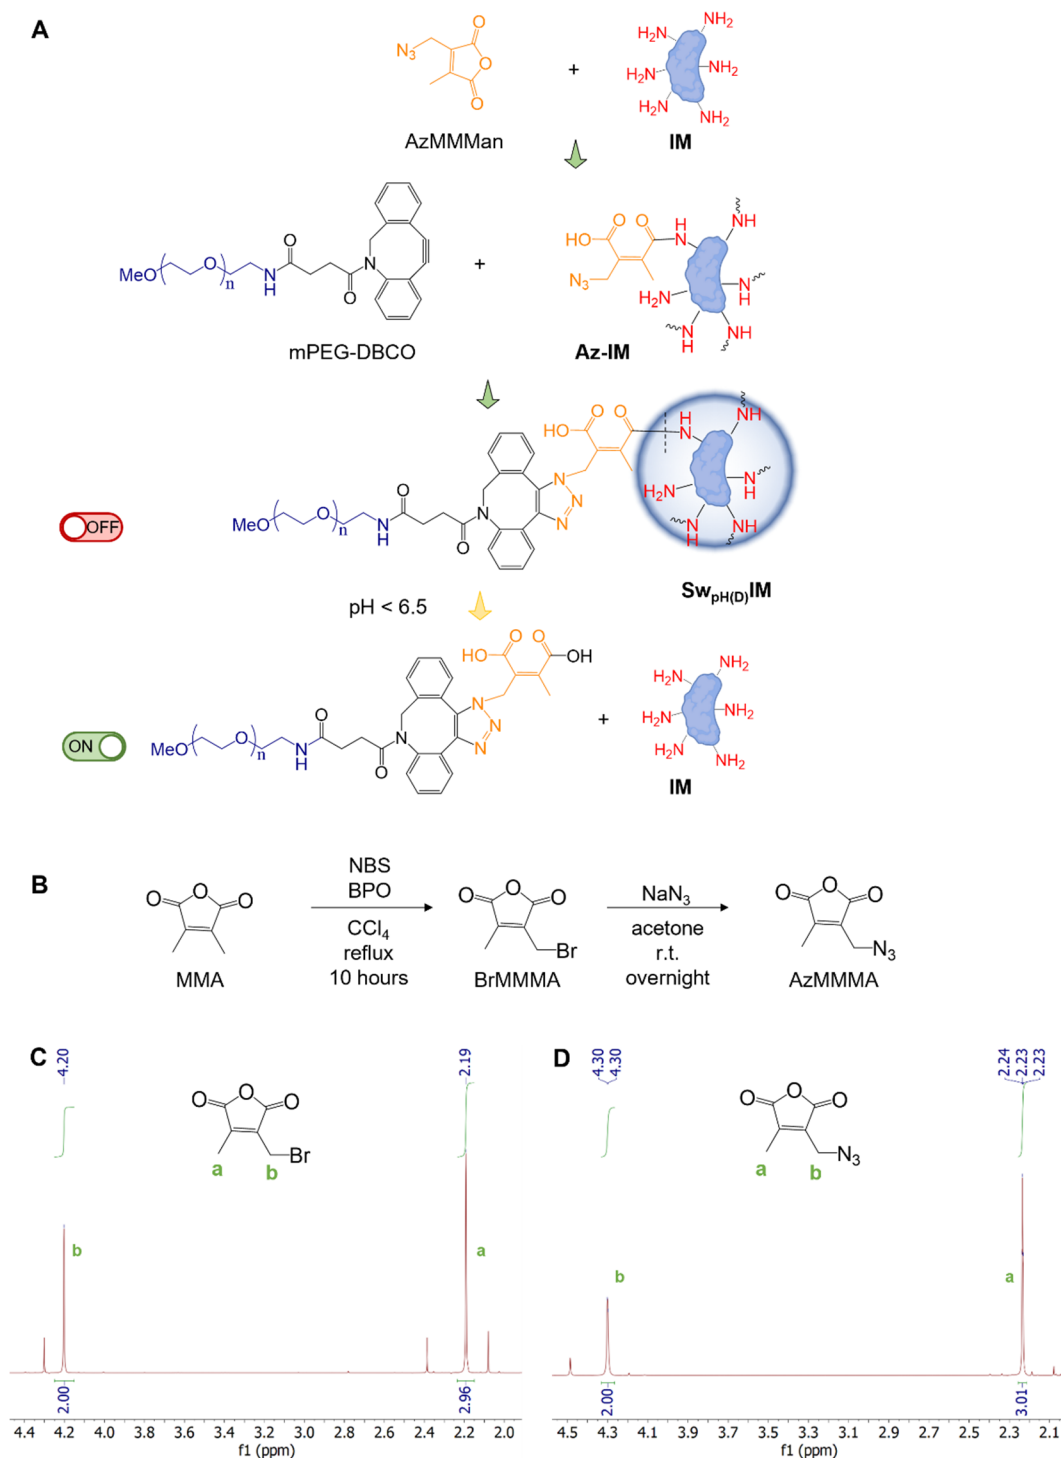

**Fig. S6. Preparation of  $Sw_{pH(D)}IMs$ .** (A) Schematic illustration of the preparation and switch on of  $Sw_{pH(D)}IM$ . mPEG-DBCO, dibenzocyclooctyne-functionalized mPEG; AzMMMan, (azidomethyl)methylmaleic anhydride; **Az-IM**, azido-functionalized **IM**. The dash line indicates the cleavable bond in acidic environment. (B) Synthesis of pH-responsive linker AzMMMan. (C)  $^1H$  NMR spectrum of the intermediate product (bromomethyl)methylmaleic anhydride (BrMMMan), (400 MHz,  $CDCl_3$ ) 4.20 (s, 2H,  $CH_2Br$ ), 2.19 (s, 3H,  $CH_3$ ). (D)  $^1H$  NMR spectrum of AzMMMan, (400 MHz,  $CDCl_3$ ) 4.29 (d,  $J < 1.0$  Hz, 2H,  $CH_2N_3$ ), 2.23 (t,  $J = 1.0$  Hz, 3H,  $CH_3$ ).

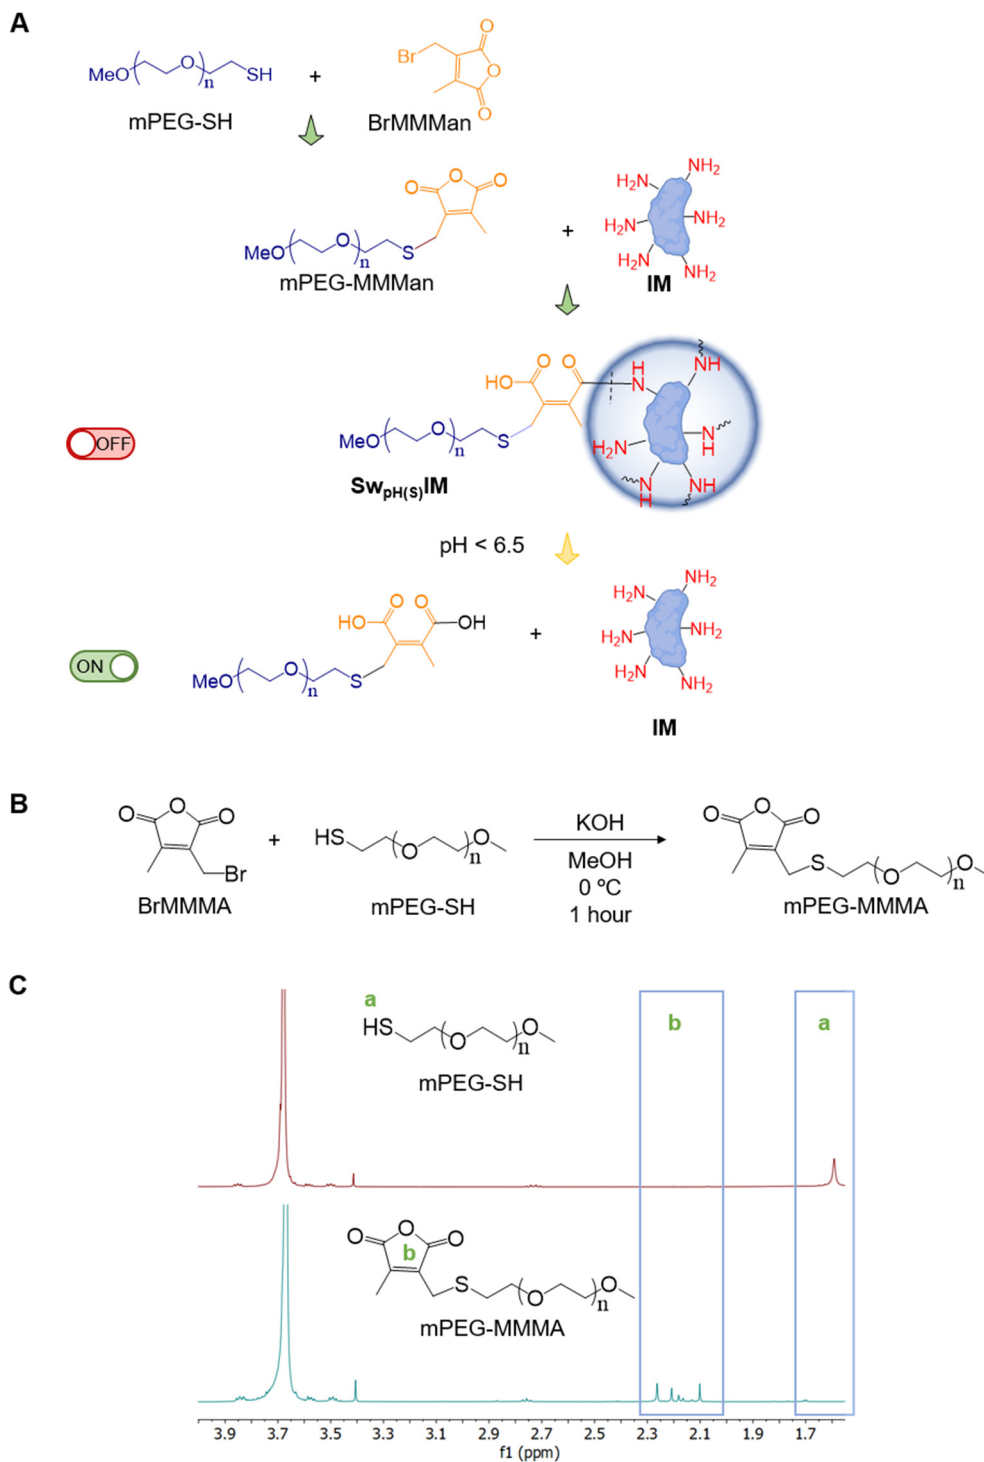

**Fig. S7. Preparation of  $Sw_{pH(s)}IMs$ .** (A) Schematic illustration of the preparation and switch on of  $Sw_{pH(s)}IM$ , mPEG-SH, mPEG thiol, the dash line indicates the cleavable bond in acidic environment. (B) Synthesis of MMA functionalized PEG, mPEG-MMMA. (C)  $^1H$  NMR spectra of mPEG-SH and mPEG-MMMA. Blue boxes highlight the characteristic peaks of MMA moieties and thiol groups.



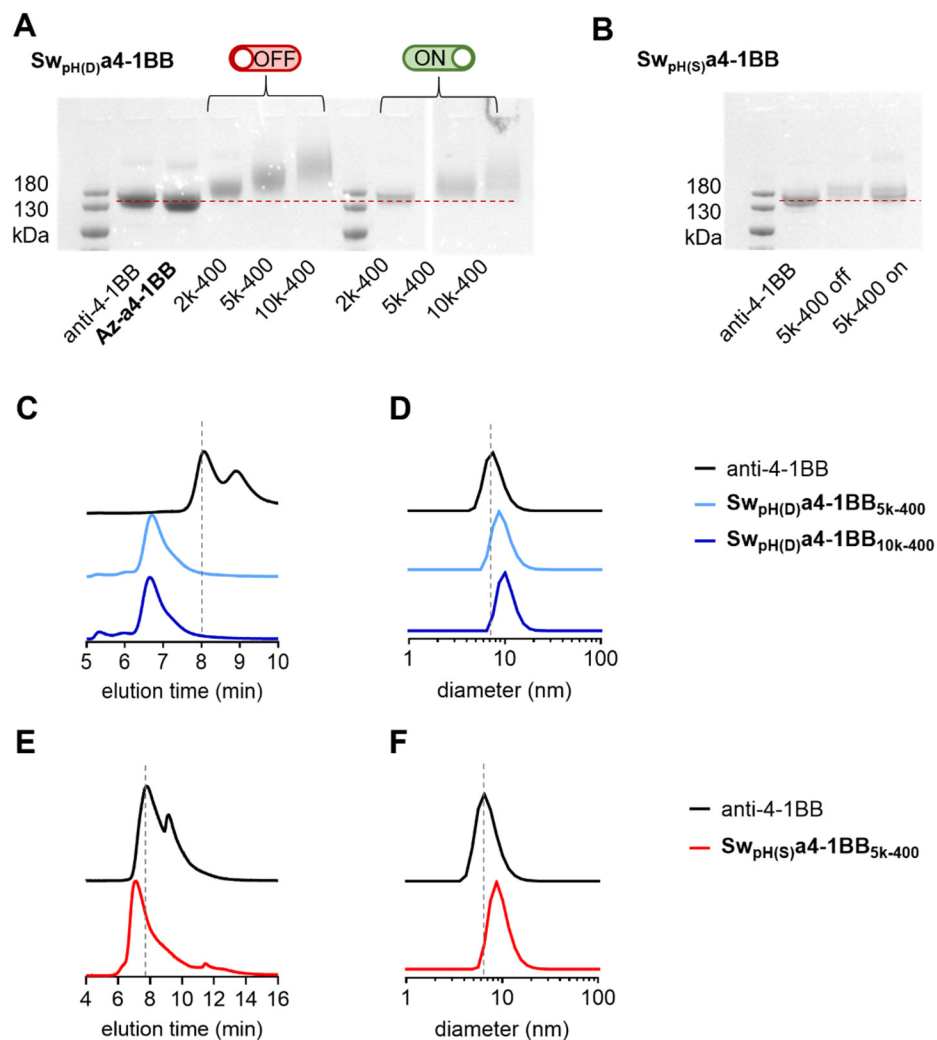

**Fig. S8. Characterizations of acidic pH-responsive Sw-IMs.** (A) SDS-PAGE characterization of  $Sw_{pH(D)}a4-1BB$ s at off and on status. **Az-a4-1BB**, azido-functionalized anti-4-1BB. (B) SDS-PAGE characterization of  $Sw_{pH(S)}a4-1BB$  at off and on status. (C) UHPLC-SEC traces of  $Sw_{pH(D)}a4-1BB$ s. (D) Hydrodynamic diameters of  $Sw_{pH(D)}a4-1BB$ s measured by DLS. (E) UHPLC-SEC traces of  $Sw_{pH(S)}a4-1BB_{5k-400}$ . (F) Hydrodynamic diameter of  $Sw_{pH(S)}a4-1BB_{5k-400}$  measured by DLS. Dash lines indicate the molecular weight, elution time, and hydrodynamic diameter of native anti-4-1BB.

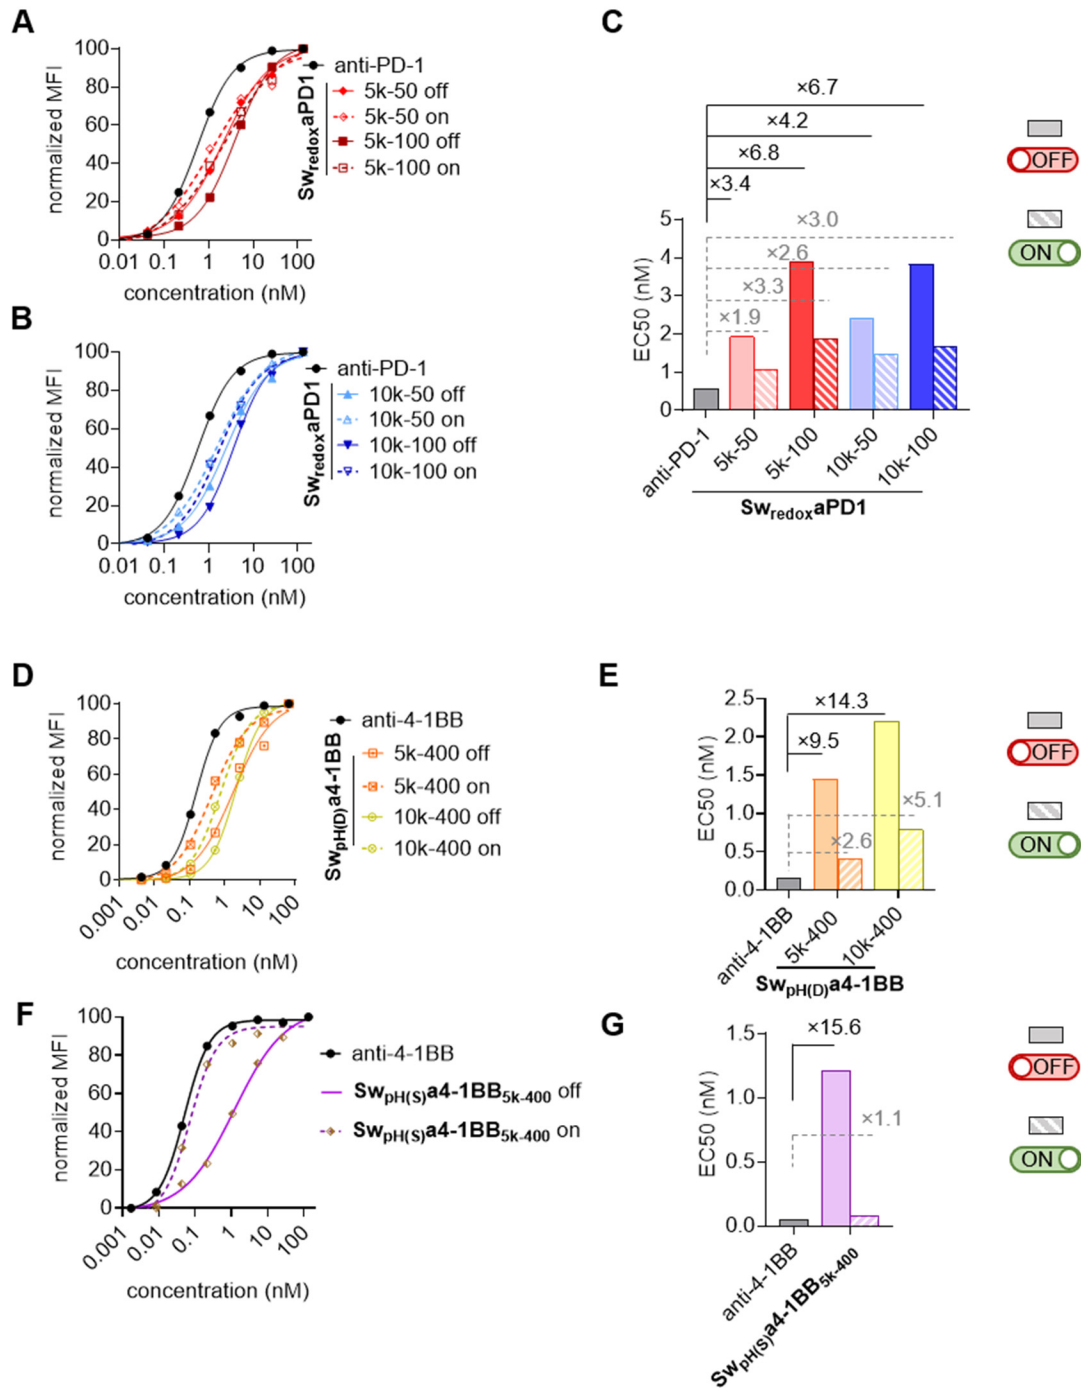

**Fig. S9. Controlled switch off and on status of Sw-IMs characterized by a T cell binding assay.** Activated CD8<sup>+</sup> T cells ( $1 \times 10^5$ ) were incubated with Alexa Fluor<sup>TM</sup>647 (Alx-647)-labelled Sw-IMs at off or on status of series diluted concentrations for 1 hour. Mean fluorescent intensity (MFI) of Alx-647 on CD8<sup>+</sup> T cells was measured by flow cytometry to represent the binding capacity. (A, B, D, F) Binding capacity of Sw-IMs at off and on status with CD8<sup>+</sup> T cells. The plot of each formulation is a representative of three independent experiments. (C, E, G) The half maximal effective concentrations (EC50s) of Sw-IMs at off and on status.

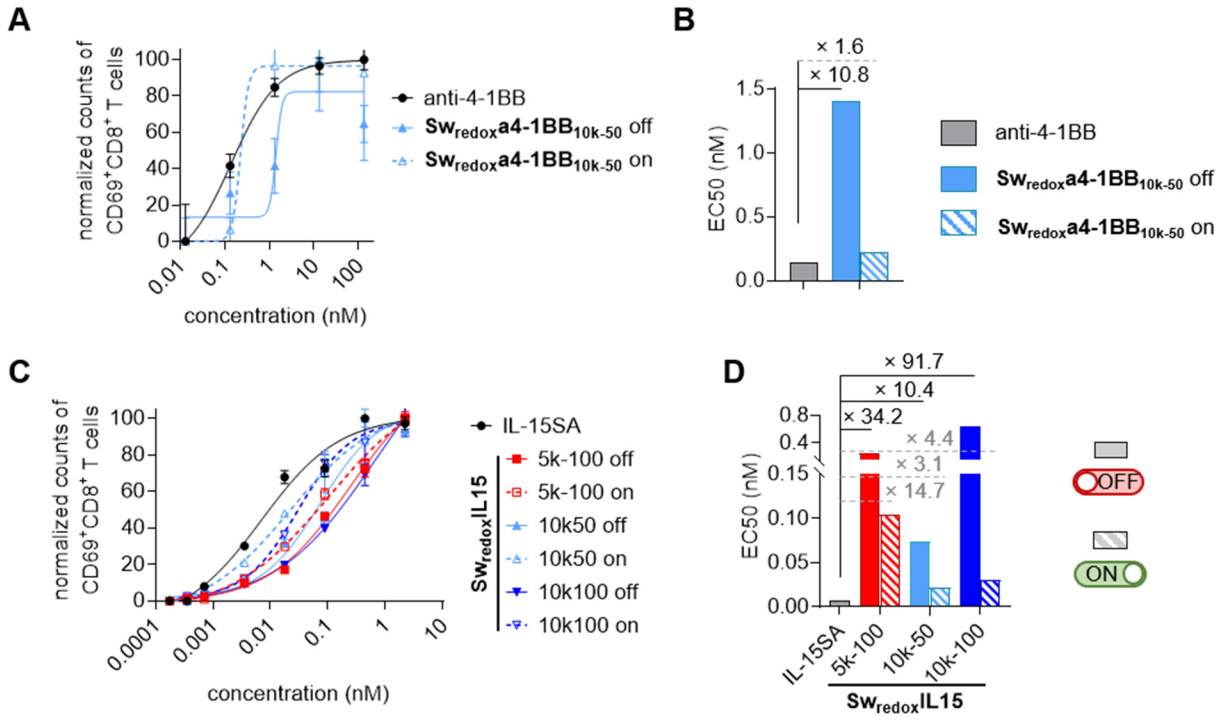

**Fig. S10. Controlled switch off and on status of Sw-IMs characterized by a functional activity assay** (A) Activities of Sw<sub>redox</sub>a4-1BB<sub>10k-50</sub> and native anti-4-1BB at off and on status in stimulating naïve CD8<sup>+</sup> T cells. (B) EC50s of Sw<sub>redox</sub>a4-1BB<sub>10k-50</sub> at off and on status. (C) Activities of Sw<sub>redox</sub>IL15s and native IL-15SA at off and on status in stimulating CD8<sup>+</sup> T cells. (D) EC50s of Sw<sub>redox</sub>IL15s at off and on status.

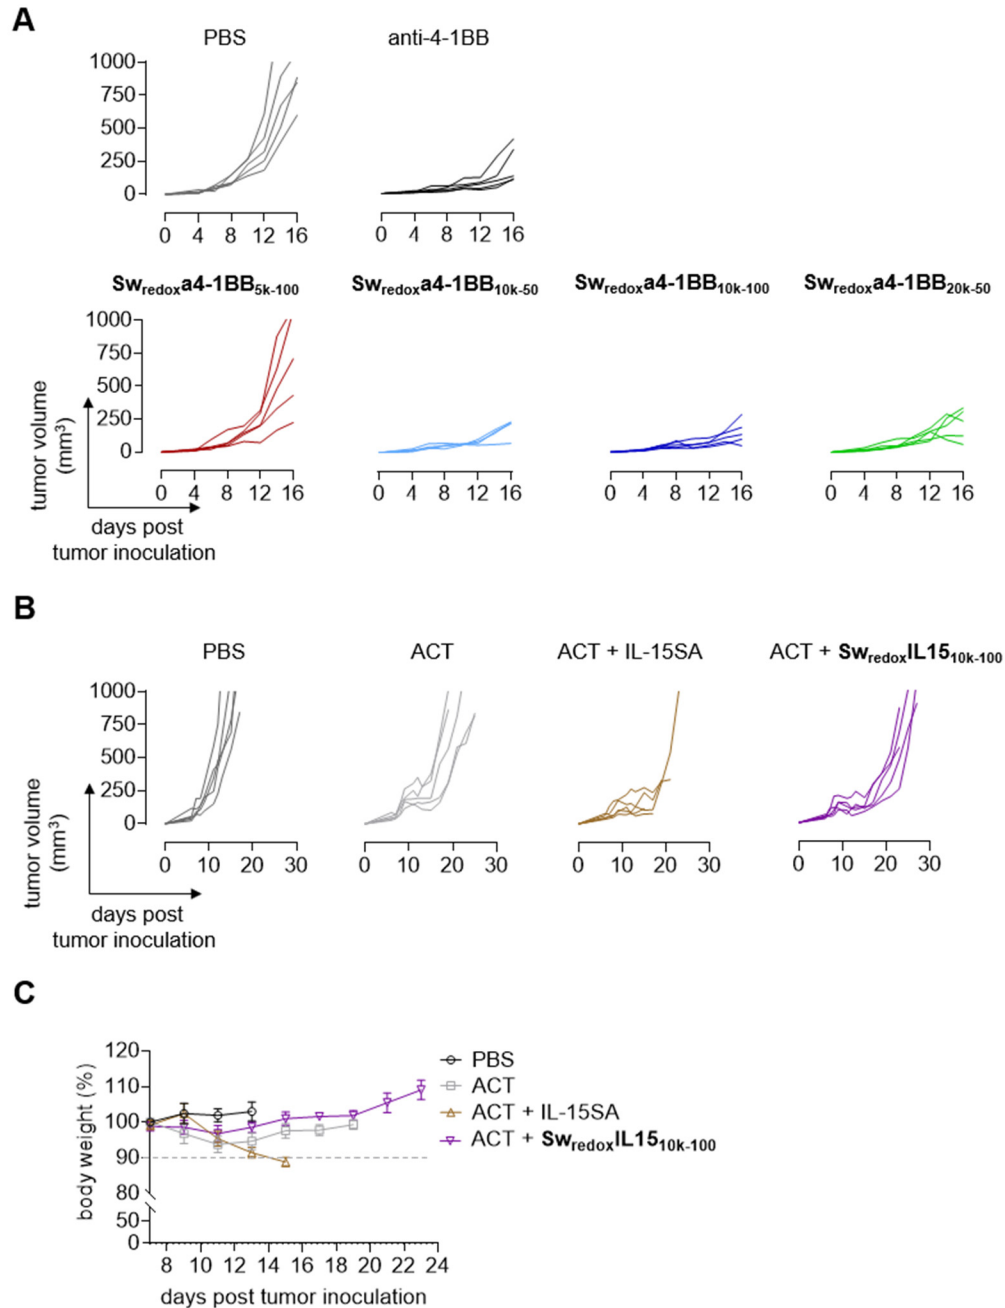

**Fig. S11. Selective switch on of Sw-IMs in the tumor microenvironment leading to antitumor immunity.** (A) C57BL/6 mice were inoculated subcutaneously (s.c.) with MC38 murine colon adenocarcinoma cells ( $2 \times 10^5$ ) and received intraperitoneal (i.p.) administration of native anti-4-1BB (100  $\mu$ g), Sw<sub>redox</sub>a4-1BBs (equivalent dose of anti-4-1BB), or PBS on day 4, 7, and 10 ( $n = 5$  mice). Shown are individual tumor growth curves. (B, C) C57BL/6 mice were inoculated s.c. with B16F10 melanoma cells ( $5 \times 10^5$ ) and received adoptive transfer of activated Pmel Thy1.1<sup>+</sup>CD8<sup>+</sup> T cells ( $1 \times 10^7$ ) on day 7 followed by intravenous (i.v.) administration of native IL-15SA (5  $\mu$ g), Sw<sub>redox</sub>IL15<sub>10k-100</sub> (equivalent dose of IL-15SA), or PBS every other day from day 7 to day 21 ( $n = 5$  mice). (B) Individual tumor growth curves. (C) Average body weight of the treated mice.

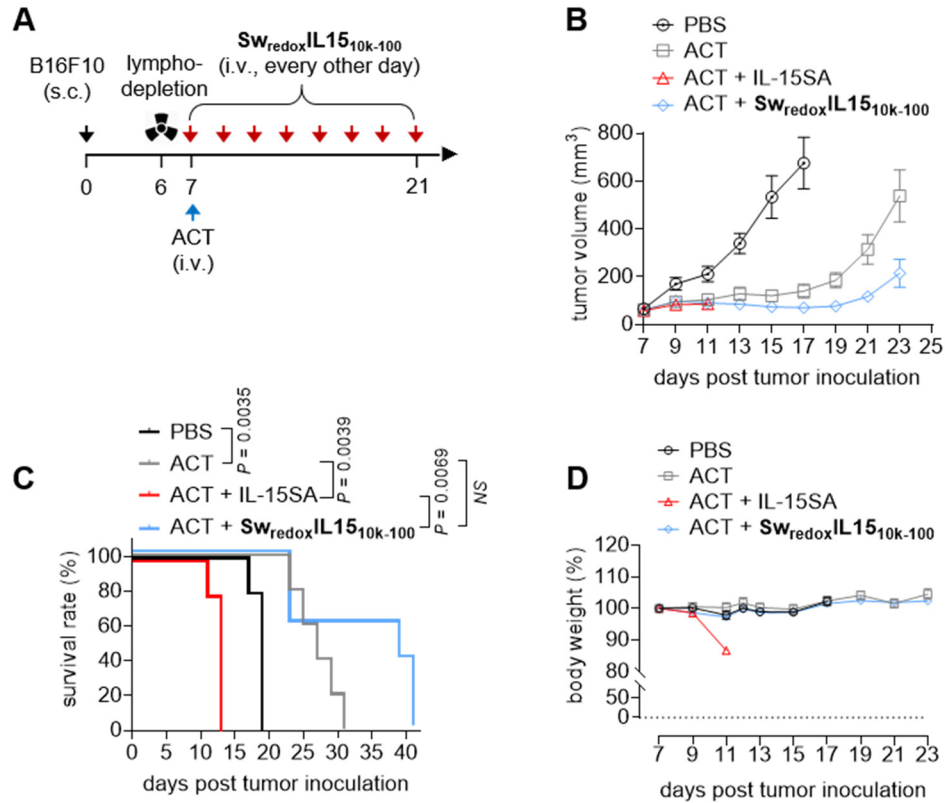

**Fig. S12.  $Sw_{redox}IL15_{10k-100}$  led to equivalent antitumor immunity but much enhanced safety compared to the native IL-15SA in adoptive T cell transfer (ACT) therapy with prior lymphodepletion.** (A) C57BL/6 mice were inoculated s.c. with B16F10 cells ( $5 \times 10^5$ ) and received lymphodepletion (4 Gy) one day prior to the adoptive transfer of activated Pmel Thy1.1<sup>+</sup>CD8<sup>+</sup> T cells ( $1 \times 10^7$ ) on day 7, which was followed by i.v. administration of native IL-15SA (10  $\mu$ g),  $Sw_{redox}IL15_{10k-100}$  (equivalent dose of IL-15SA), or PBS every other day from day 7 to day 21 ( $n = 5$  mice). (B) Average tumor growth curves. (C) Survival curves. (D) Average body weights. All data represent the mean  $\pm$  s.e.m. and are analyzed by Log-rank test; NS, not significant ( $P > 0.05$ ).

spleen

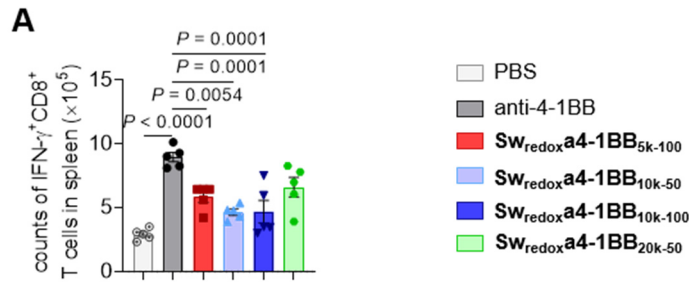

liver

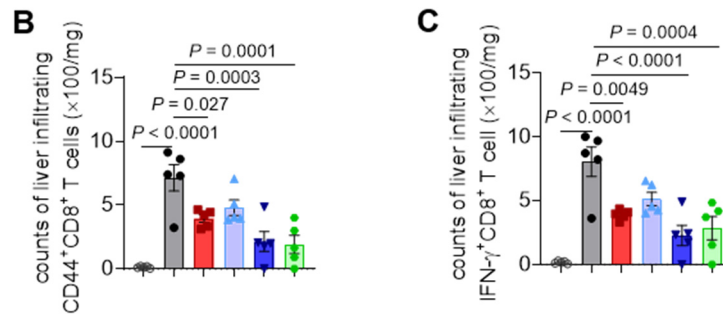

**Fig. S13. Sw<sub>redox</sub>a4-1BBs significantly reduced the toxicity of anti-4-1BB agonistic antibody therapy.** C57BL/6 mice bearing MC38 colon adenocarcinoma were treated as shown in Fig. 3A. Mice were euthanatized on day 16 and the tissues were processed for histological and flow cytometry analyses (n = 5 mice). **(A)** Counts of IFN- $\gamma$ -secreting CD8<sup>+</sup> T cells in spleen. **(B)** Counts of liver infiltrating CD44<sup>+</sup>CD8<sup>+</sup> T cells. **(C)** Counts of liver infiltrating IFN- $\gamma$ -secreting CD8<sup>+</sup> T cells. All data represent the mean  $\pm$  s.e.m. and are analyzed by one-way ANOVA.

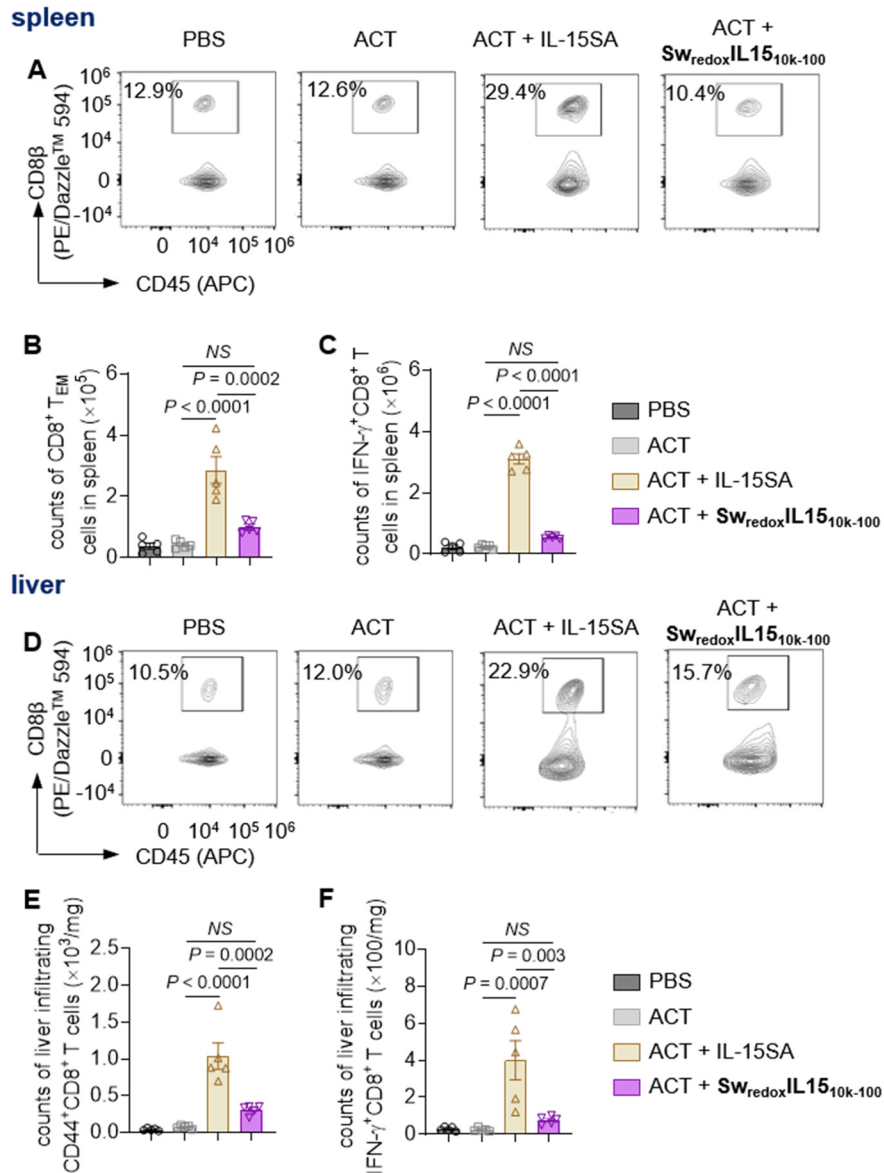

**Fig. S14.  $Sw_{redox}IL15$  markedly reduced the toxicity of the combination immunotherapy of IL-15SA and ACT.** C57BL/6 mice were inoculated s.c. with B16F10 melanoma ( $5 \times 10^5$ ) and received adoptive transfer of Thy1.1<sup>+</sup>CD8<sup>+</sup> T cells ( $1 \times 10^7$ ) on day 7 followed by i.v. administration of native IL-15SA (10  $\mu$ g),  $Sw_{redox}IL15_{10k-100}$  (equivalent dose of IL-15SA), or PBS every other day from day 7 to day 13. Mice were euthanatized on day 14 and the tissues were processed for flow cytometry analyses (n = 5 mice). (A) Representative flow cytometry plots of CD8<sup>+</sup> T cells among all lymphocytes (CD45<sup>+</sup>) in spleen. (B) Counts of effector memory CD8<sup>+</sup> T cells (T<sub>EM</sub>, CD44<sup>high</sup>CD62L<sup>low</sup>) in spleen. (C) Counts of IFN- $\gamma$ -secreting CD8<sup>+</sup> T cells in spleen. (D) Representative flow cytometry plots of CD8<sup>+</sup> T cells among all liver infiltrating lymphocytes (CD45<sup>+</sup>). (E) Counts of liver infiltrating CD44<sup>+</sup>CD8<sup>+</sup> T cells. (F) Counts of liver-infiltrating IFN- $\gamma$ -secreting T cells. All data represent the mean  $\pm$  s.e.m. and are analyzed by one-way ANOVA; NS, not significant (P > 0.05).

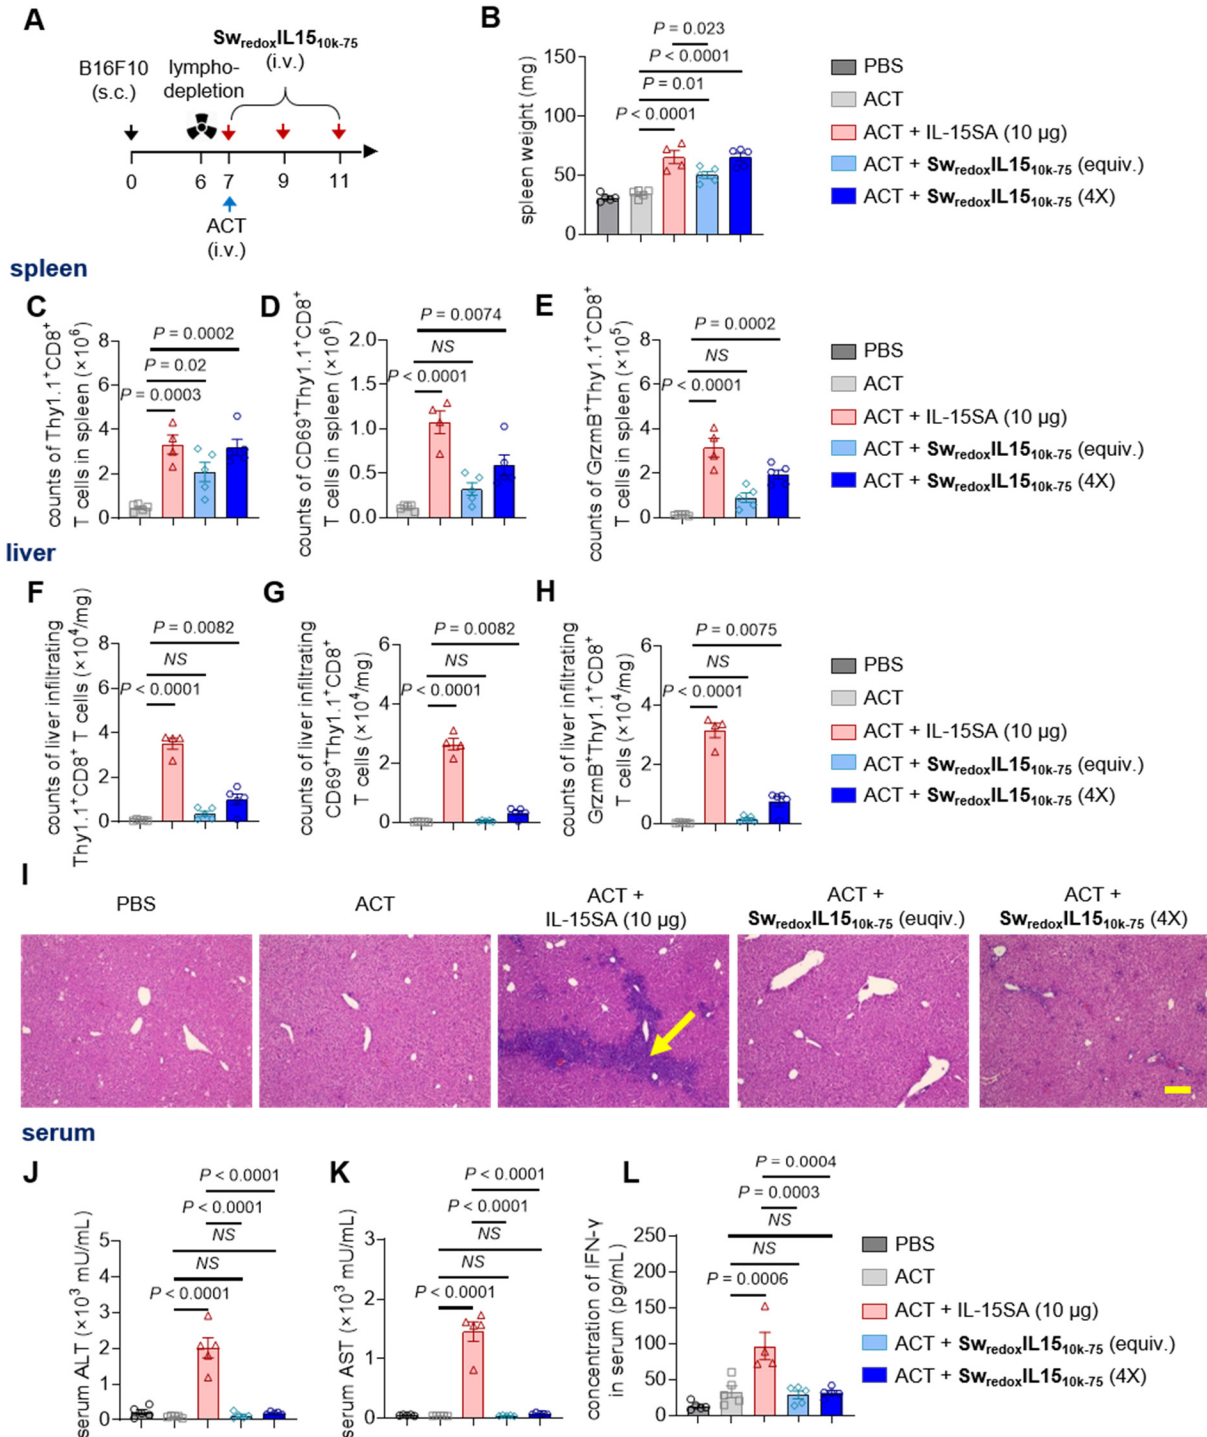

**Fig. S15.  $Sw_{redox}IL15$  markedly reduced the toxicity of the combination immunotherapy of IL-15SA and ACT with prior lymphodepletion.** (A) C57BL/6 mice were inoculated s.c. with B16F10 melanoma ( $5 \times 10^5$ ) and received lymphodepletion (4 Gy) one day prior to the adoptive transfer of activated Pmel Thy1.1<sup>+</sup>CD8<sup>+</sup> T cells ( $1 \times 10^7$ ) on day 7, which was followed by i.v. administration of native IL-15SA (10  $\mu$ g),  $Sw_{redox}IL15_{10k-75}$  (equivalent dose of IL-15SA),  $Sw_{redox}IL15_{10k-75}$  (4 $\times$  dose of IL-15SA), or PBS on day 7, 9, and 11. Mice were euthanized on



day 12 and the tissues were processed for flow cytometry and histological analyses (n = 5 mice). **(B)** Average spleen weight. **(C)** Counts of Thy1.1<sup>+</sup>CD8<sup>+</sup> T cells in spleen. **(D)** Counts of CD69<sup>+</sup>Thy1.1<sup>+</sup>CD8<sup>+</sup> T cells in spleen. **(E)** Counts of GrzmB-secreting Thy1.1<sup>+</sup>CD8<sup>+</sup> T cells in spleen. **(F)** Counts of liver infiltrating Thy1.1<sup>+</sup>CD8<sup>+</sup> T cells. **(G)** Counts of liver infiltrating CD69<sup>+</sup>Thy1.1<sup>+</sup>CD8<sup>+</sup> T cells. **(H)** Counts of liver infiltrating GrzmB-secreting Thy1.1<sup>+</sup>CD8<sup>+</sup> T cells. **(I)** Histopathological analyses of liver tissues. Yellow arrows indicate tissue damage. Scale bar, 200 μm. **(J)** Serum activity of alanine aminotransferase (ALT). **(K)** Serum activity of aspartate transaminase (AST). **(L)** Serum concentration of IFN-γ. All data represent the mean ± s.e.m. and are analyzed by one-way ANOVA; *NS*, not significant (P > 0.05).

**A**  $Sw_{redox}IL15$ 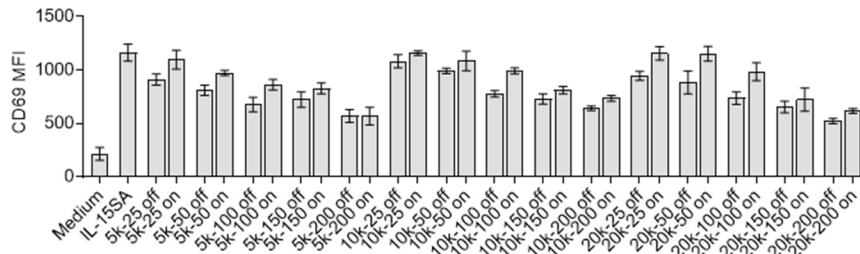**B**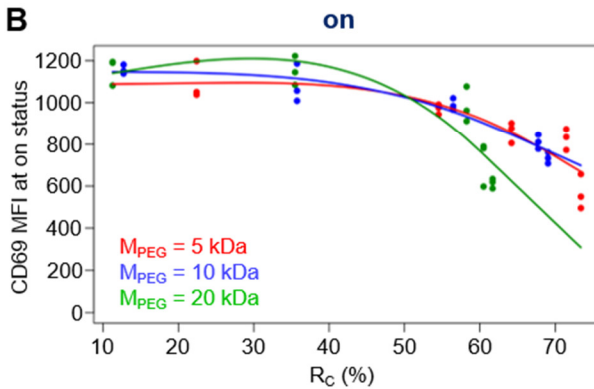**C**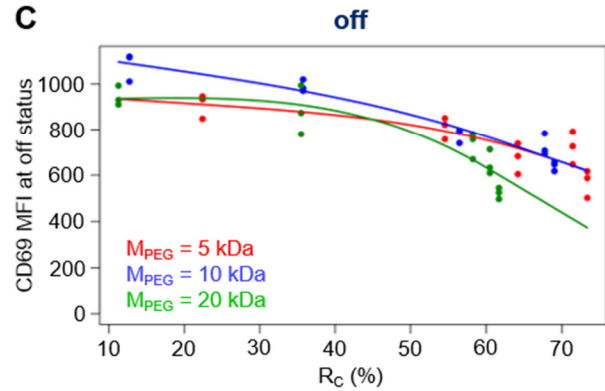

**Fig. S16. In vitro T cell activation by  $Sw_{redox}IL15$ s of different formulations. (A)** MFI of CD69 expressed by  $CD8^+$  T cells cultured with  $Sw_{redox}IL15$ s at off and on status or native IL-15SA. **(B, C)** Plots of CD69 MFI of  $Sw_{redox}IL15$ s with different  $M_{PEG}$  at off and on status as functions of  $R_C$ . Smooth curves were obtained using penalized cubic regression splines.

**Table S1. Preparation of Sw-IMs of various formulations.**

| Entry | Sw-IM*                                        | IM          | linker <sup>†</sup> | M <sub>PEG</sub> <sup>‡</sup> (Da) | R <sub>F</sub> <sup>§</sup> | R <sub>C</sub> <sup>  </sup> (%) |
|-------|-----------------------------------------------|-------------|---------------------|------------------------------------|-----------------------------|----------------------------------|
| 1     | Sw <sub>redox</sub> aTNP <sub>2k-50</sub>     | anti-TNP    | SS                  | 2k                                 | 50                          | 62.1                             |
| 2     | Sw <sub>redox</sub> aTNP <sub>2k-100</sub>    | anti-TNP    | SS                  | 2k                                 | 100                         | 73.6                             |
| 3     | Sw <sub>redox</sub> aTNP <sub>2k-200</sub>    | anti-TNP    | SS                  | 2k                                 | 200                         | 81.9                             |
| 4     | Sw <sub>redox</sub> aTNP <sub>5k-50</sub>     | anti-TNP    | SS                  | 5k                                 | 50                          | 68.9                             |
| 5     | Sw <sub>redox</sub> aTNP <sub>5k-100</sub>    | anti-TNP    | SS                  | 5k                                 | 100                         | 74.3                             |
| 6     | Sw <sub>redox</sub> aTNP <sub>10k-50</sub>    | anti-TNP    | SS                  | 10k                                | 50                          | 52.3                             |
| 7     | Sw <sub>redox</sub> aTNP <sub>10k-200</sub>   | anti-TNP    | SS                  | 10k                                | 200                         | 67.8                             |
| 8     | Sw <sub>redox</sub> a4-1BB <sub>2k-50</sub>   | anti-4-1BB  | SS                  | 2k                                 | 50                          | 47.7                             |
| 9     | Sw <sub>redox</sub> a4-1BB <sub>2k-100</sub>  | anti-4-1BB  | SS                  | 2k                                 | 100                         | 52.8                             |
| 10    | Sw <sub>redox</sub> a4-1BB <sub>2k-200</sub>  | anti-4-1BB  | SS                  | 2k                                 | 200                         | 56.6                             |
| 11    | Sw <sub>redox</sub> a4-1BB <sub>5k-200</sub>  | anti-4-1BB  | SS                  | 5k                                 | 200                         | 83.1                             |
| 12    | Sw <sub>redox</sub> a4-1BB <sub>10k-200</sub> | anti-4-1BB  | SS                  | 10k                                | 200                         | 80.4                             |
| 13    | Sw <sub>redox</sub> a4-1BB <sub>20k-25</sub>  | anti-4-1BB  | SS                  | 20k                                | 25                          | 53.5                             |
| 14    | Sw <sub>redox</sub> aPD1 <sub>2k-50</sub>     | anti-PD-1   | SS                  | 2k                                 | 50                          | 65.4                             |
| 15    | Sw <sub>redox</sub> aPD1 <sub>2k-100</sub>    | anti-PD-1   | SS                  | 2k                                 | 100                         | 77.7                             |
| 16    | Sw <sub>redox</sub> aPD1 <sub>2k-200</sub>    | anti-PD-1   | SS                  | 2k                                 | 200                         | 83.2                             |
| 17    | Sw <sub>redox</sub> aPD1 <sub>5k-50</sub>     | anti-PD-1   | SS                  | 5k                                 | 50                          | 74.7                             |
| 18    | Sw <sub>redox</sub> aPD1 <sub>5k-100</sub>    | anti-PD-1   | SS                  | 5k                                 | 100                         | 77.2                             |
| 19    | Sw <sub>redox</sub> aPD1 <sub>5k-200</sub>    | anti-PD-1   | SS                  | 5k                                 | 200                         | 83.6                             |
| 20    | Sw <sub>redox</sub> aPD1 <sub>10k-50</sub>    | anti-PD-1   | SS                  | 10k                                | 50                          | 60.8                             |
| 21    | Sw <sub>redox</sub> aPD1 <sub>10k-200</sub>   | anti-PD-1   | SS                  | 10k                                | 200                         | 64.3                             |
| 22    | Sw <sub>redox</sub> aCTLA4 <sub>2k-50</sub>   | anti-CTLA-4 | SS                  | 2k                                 | 50                          | 57.7                             |
| 23    | Sw <sub>redox</sub> aCTLA4 <sub>2k-100</sub>  | anti-CTLA-4 | SS                  | 2k                                 | 100                         | 72.9                             |
| 24    | Sw <sub>redox</sub> aCTLA4 <sub>2k-200</sub>  | anti-CTLA-4 | SS                  | 2k                                 | 200                         | 79.1                             |
| 25    | Sw <sub>redox</sub> aCTLA4 <sub>5k-50</sub>   | anti-CTLA-4 | SS                  | 5k                                 | 50                          | 66.0                             |
| 26    | Sw <sub>redox</sub> aCTLA4 <sub>5k-100</sub>  | anti-CTLA-4 | SS                  | 5k                                 | 100                         | 70.2                             |
| 27    | Sw <sub>redox</sub> aCTLA4 <sub>5k-200</sub>  | anti-CTLA-4 | SS                  | 5k                                 | 200                         | 82.2                             |
| 28    | Sw <sub>redox</sub> aCTLA4 <sub>10k-50</sub>  | anti-CTLA-4 | SS                  | 10k                                | 50                          | 53.5                             |
| 29    | Sw <sub>redox</sub> aCTLA4 <sub>10k-200</sub> | anti-CTLA-4 | SS                  | 10k                                | 200                         | 58.7                             |
| 30    | Sw <sub>redox</sub> IL15 <sub>5k-25</sub>     | IL-15SA     | SS                  | 5k                                 | 25                          | 22.4                             |
| 31    | Sw <sub>redox</sub> IL15 <sub>5k-50</sub>     | IL-15SA     | SS                  | 5k                                 | 50                          | 54.5                             |
| 32    | Sw <sub>redox</sub> IL15 <sub>5k-150</sub>    | IL-15SA     | SS                  | 5k                                 | 150                         | 71.5                             |
| 33    | Sw <sub>redox</sub> IL15 <sub>5k-200</sub>    | IL-15SA     | SS                  | 5k                                 | 200                         | 73.4                             |
| 34    | Sw <sub>redox</sub> IL15 <sub>10k-25</sub>    | IL-15SA     | SS                  | 10k                                | 25                          | 12.7                             |
| 35    | Sw <sub>redox</sub> IL15 <sub>10k-75</sub>    | IL-15SA     | SS                  | 10k                                | 75                          | 49.5                             |
| 36    | Sw <sub>redox</sub> IL15 <sub>10k-150</sub>   | IL-15SA     | SS                  | 10k                                | 150                         | 67.7                             |
| 37    | Sw <sub>redox</sub> IL15 <sub>10k-200</sub>   | IL-15SA     | SS                  | 10k                                | 200                         | 69.0                             |
| 38    | Sw <sub>redox</sub> IL15 <sub>20k-25</sub>    | IL-15SA     | SS                  | 20k                                | 25                          | 11.3                             |
| 39    | Sw <sub>redox</sub> IL15 <sub>20k-100</sub>   | IL-15SA     | SS                  | 20k                                | 100                         | 58.2                             |
| 40    | Sw <sub>redox</sub> IL15 <sub>20k-150</sub>   | IL-15SA     | SS                  | 20k                                | 150                         | 60.5                             |

|    |                                                   |            |      |     |     |      |
|----|---------------------------------------------------|------------|------|-----|-----|------|
| 41 | <b>Sw<sub>redox</sub>IL15<sub>20k-200</sub></b>   | IL-15SA    | SS   | 20k | 200 | 61.7 |
| 42 | <b>Sw<sub>pH(D)</sub>a4-1BB<sub>2k-400</sub></b>  | anti-4-1BB | DBCO | 2k  | 400 |      |
| 43 | <b>Sw<sub>pH(D)</sub>a4-1BB<sub>10k-400</sub></b> | anti-4-1BB | DBCO | 10k | 400 |      |

\***Sw-IM**, switchable immune modulator. **Sw-IM** is denoted as **Sw<sub>linker</sub>protein<sub>MPEG-RF</sub>**. **redox**, redox-responsive linker; **pH(D)**, acidic pH-responsive linker with a DBCO-triazole spacer; **aTNP**, anti-TNP antibody; **a4-1BB**, anti-4-1BB antibody; **aPD1**, anti-PD-1 antibody; **aCTLA4**, anti-CTLA-4 antibody; **IL15**, IL-15SA.

†The chemical structure of the linkers is shown in Fig. 1. SS, disulphate linker; DBCO, dibenzocyclooctyne.

‡M<sub>PEG</sub>, molecular weight of polyethylene glycol (PEG).

§R<sub>F</sub>, feeding mole ratio of PEG to **IM**.

¶R<sub>C</sub>, conjugation ratio, defined as (number of conjugated NH<sub>2</sub> groups / total number of NH<sub>2</sub> groups of **IM**) × 100%.
